# Supplementary material for: Modification Effects of Population Expansion, Ageing, and Adaptation on Heat-Related Mortality Risks Under Different Climate Change Scenarios in Guangzhou, China
Source: PubMed Central journal article supplement (PMC6388188; doi:10.3390/ijerph16030376), 2019-01-29
Supplement: ijerph-16-00376-s001.pdf [file ijerph-16-00376-s001.pdf]

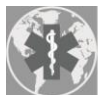

*Supplemental Material*

# **Modification effects of urban expansion, ageing and adaptation on heat-related mortality risks under different climate change scenarios**

Tao Liu, Zhoupeng Ren, Yonghui Zhang, Baixiang Feng, Hualiang Lin, Jianpeng Xiao, Weilin Zeng, Xing Li, Zhihao Li, Shannon Rutherford, Yanjun Xu, Shao Lin, Philip C Nasca, Yaodong Du, Jinfeng Wang, Cunrui Huang, Qingfeng Du, Peng Jia, Wenjun Ma

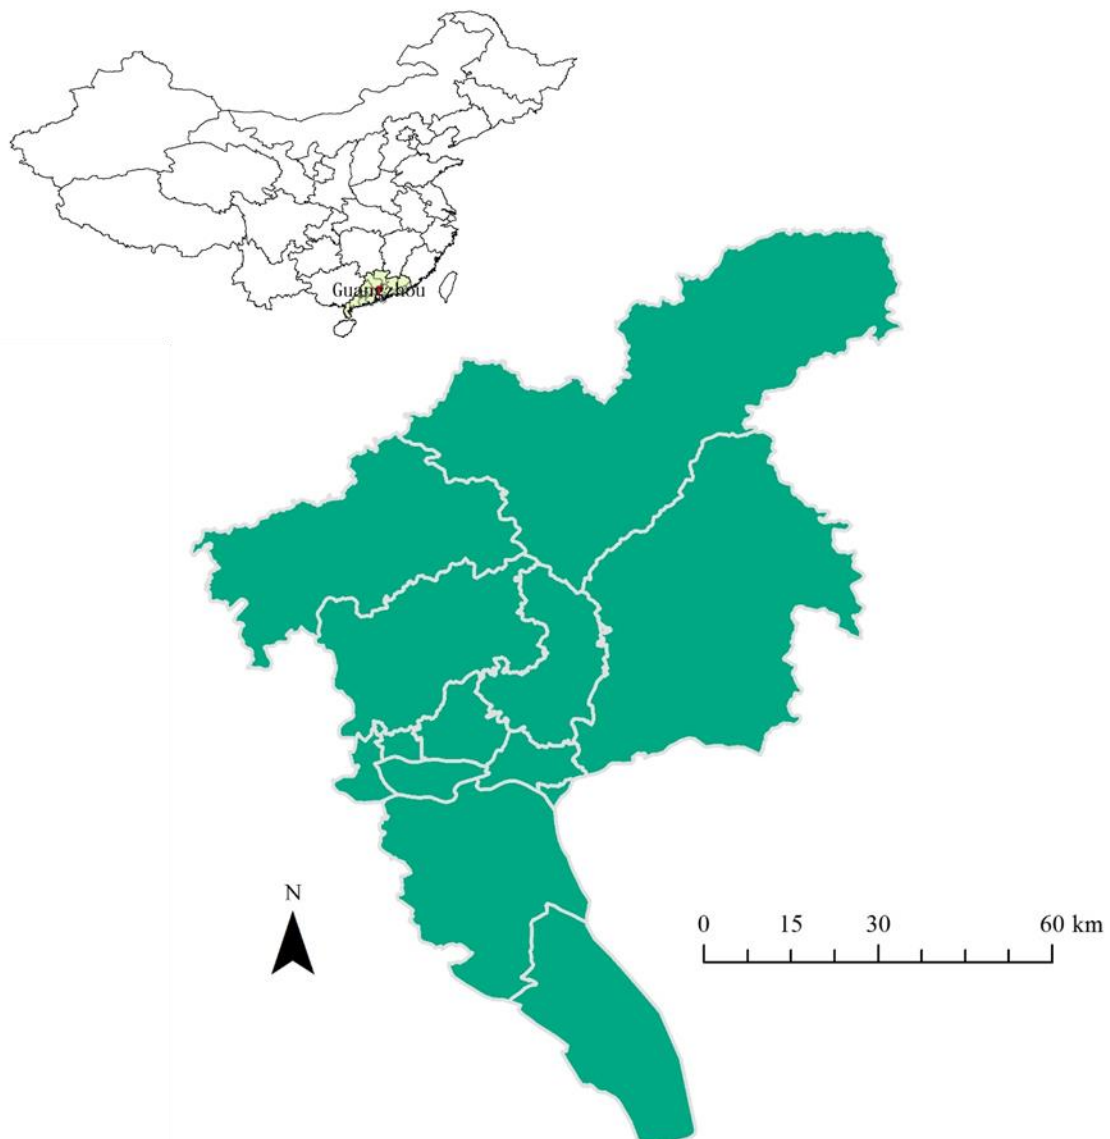

**Figure S1.** The location of Guangzhou, China.

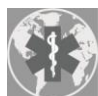

**Table S1.** Detailed information of 27 CMIP5 GCM models.

| Model name     | Modelling center                                                                                                                                                          | Horizontal resolution<br>(lat×lon, degree) | RCP2-6 | RCP4-5 | RCP8-5 |
|----------------|---------------------------------------------------------------------------------------------------------------------------------------------------------------------------|--------------------------------------------|--------|--------|--------|
| ACCESS1-0      | Commonwealth Scientific and Industrial Research Organization (CSIRO) and Bureau of Meteorology (BOM), Australia                                                           | 1.25×1.875                                 |        | √      | √      |
| ACCESS1-3      |                                                                                                                                                                           | 1.25×1.875                                 |        | √      | √      |
| bcc_csm1_1     | Beijing Climate Center, China Meteorological Administration                                                                                                               | 2.77×2.81                                  | √      | √      | √      |
| bcc_csm1_1_m   |                                                                                                                                                                           | 1.1×1.1                                    | √      | √      | √      |
| BNU-ESM        | College of Global Change and Earth System Science, Beijing Normal University                                                                                              | 2.8×2.8                                    | √      | √      | √      |
| CanESM2        | Canadian Centre for Climate Modelling and Analysis                                                                                                                        | 2.8×2.8                                    | √      | √      | √      |
| CCSM4          | National Center for Atmospheric Research                                                                                                                                  | 0.9×1.25                                   | √      | √      | √      |
| CESM1-BGC      | National Science Foundation, Department of Energy, National Center for Atmospheric Research                                                                               | 0.9×1.25                                   |        | √      | √      |
| CESM1-CAM5     |                                                                                                                                                                           | 0.9×1.25                                   | √      | √      | √      |
| CMCC-CM        | Centro Euro-Mediterraneo per I Cambiamenti Climatici                                                                                                                      | 0.75×0.75                                  |        | √      | √      |
| CMCC-CMS       |                                                                                                                                                                           | 1.86×1.875                                 |        | √      | √      |
| CNRM-CM5       | Centre National de Recherches Meteorologiques, Meteo-France, France                                                                                                       | 1.40×1.41                                  | √      | √      | √      |
| CSIRO-Mk3-6-0  | Commonwealth Scientific and Industrial Research Organization in collaboration with the Queensland Climate Change Centre of Excellence                                     | 1.86×1.875                                 | √      | √      | √      |
| GFDL-CM3       | NOAA Geophysical Fluid Dynamics Laboratory, USA                                                                                                                           | 2.0×2.5                                    | √      | √      | √      |
| GFDL-ESM2G     |                                                                                                                                                                           | 2.0×2.5                                    | √      | √      | √      |
| GFDL-ESM2M     |                                                                                                                                                                           | 2.0×2.5                                    |        | √      | √      |
| Inmcm4         | Institute for Numerical Mathematics, Russia                                                                                                                               | 1.5×2.0                                    |        | √      | √      |
| IPSL-CM5A-LR   | Institute Pierre-Simon Laplace, France                                                                                                                                    | 1.875×3.75                                 | √      | √      | √      |
| IPSL-CM5A-MR   |                                                                                                                                                                           | 1.25×2.5                                   | √      | √      |        |
| IPSL-CM5B-LR   |                                                                                                                                                                           | 1.875×3.75                                 |        |        | √      |
| MIROC5         | Atmosphere and Ocean Research Institute (The University of Tokyo), National Institute for Environmental Studies, and Japan Agency for Marine-Earth Science and Technology | 1.39×1.41                                  | √      | √      | √      |
| MIROC-ESM      | Japan Agency for Marine-Earth Science and Technology, Atmosphere and Ocean Research Institute (The University of Tokyo), and National Institute for Environmental Studies | 1.77×2.81                                  | √      | √      | √      |
| MIROC-ESM-CHEM |                                                                                                                                                                           | 1.77×2.81                                  | √      | √      | √      |
| MPI-ESM-LR     | Max Planck Institute for Meteorology, Germany                                                                                                                             | 1.85×1.875                                 | √      | √      | √      |
| MPI-ESM-MR     |                                                                                                                                                                           | 1.85×1.875                                 | √      | √      | √      |
| MRI-CGCM3      | Meteorological Research Institute, Japan                                                                                                                                  | 1.125×1.125                                | √      | √      | √      |
| NorESM1-M      | Norwegian Climate Centre                                                                                                                                                  | 1.875×2.5                                  | √      | √      | √      |

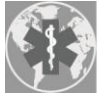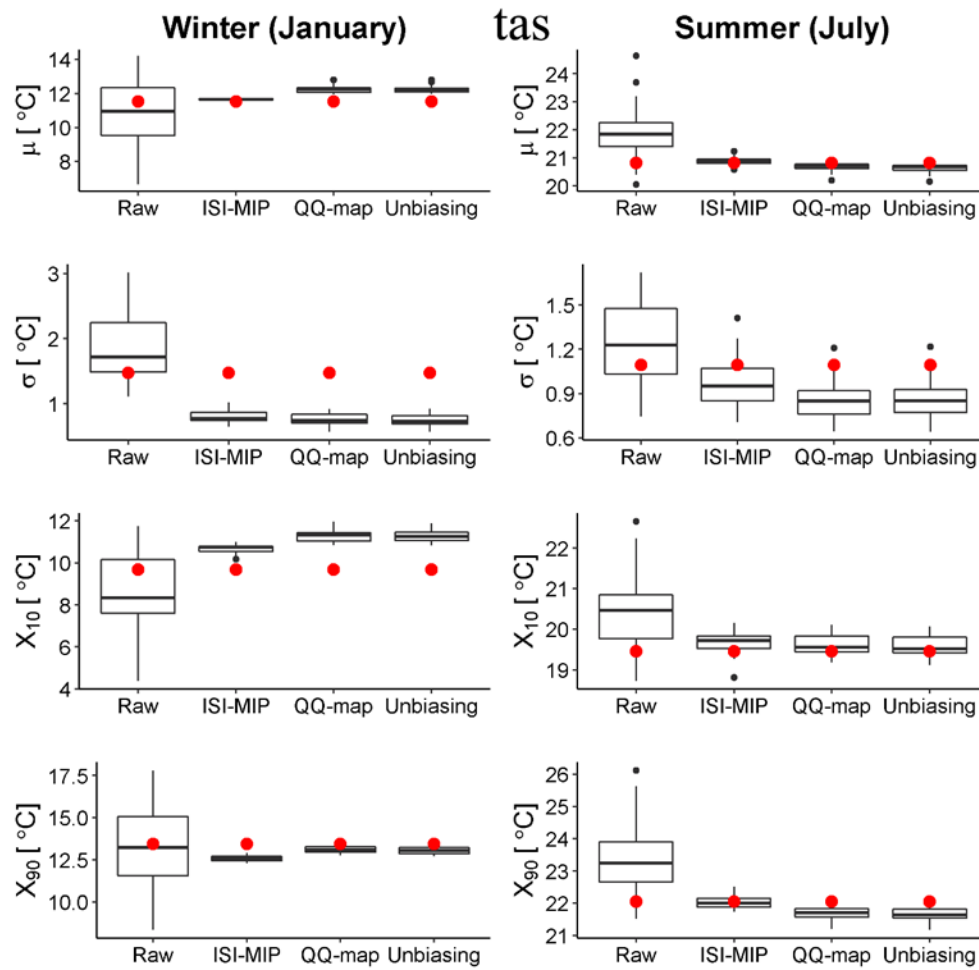

**Figure S2.** Comparison of different bias correction methods adjusting the GCM outputs.

All analyses were conducted using 27 GCM outputs and daily observed TM for 680 stations in China from 1960 to 1999. We assessed the difference between daily observed TM (red dot) and adjusted GCM outputs (box plot) corrected by different methods during winter and summer. Four indexes were employed: mean ( $\mu$ ), standard deviation ( $\sigma$ ), 10<sup>th</sup> and 90<sup>th</sup> percentiles ( $X_{10}$ ,  $X_{90}$ ).

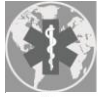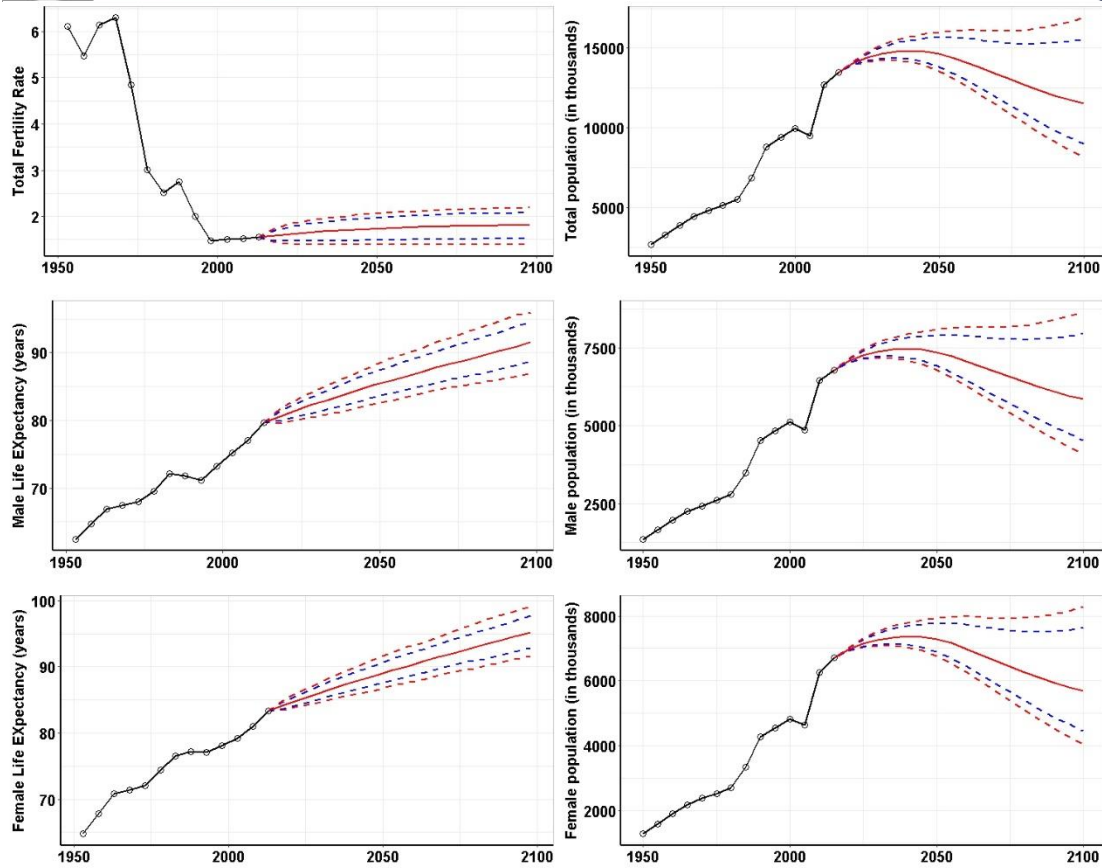

**Figure S3.** Bayesian probabilistic population projections for Guangzhou, 2020–2100: major population indicators.

The historical observed data are shown by a black line. The Bayesian predictive distributions are shown in red: median—solid; 80% prediction interval— blue dashed; 90% prediction interval— red dashed.

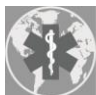

**Table S2.** Population projections in Guangzhou in the 2030s, 2060s and 2090s under different scenarios.

|                                      | Population increase scenario |        |        |
|--------------------------------------|------------------------------|--------|--------|
|                                      | Low                          | Medium | High   |
| <b>2030s</b>                         |                              |        |        |
| Total population (*1000)             | 14,229                       | 14,773 | 15,518 |
| Male population (*1000)              | 7,148                        | 7,436  | 7,832  |
| Female population (*1000)            | 7,082                        | 7,337  | 7,686  |
| Population<65 years (*1000)          | 11,012                       | 11,266 | 11,691 |
| Population≥65 years (*1000)          | 3,217                        | 3,507  | 3,827  |
| Percentage of elderly population (%) | 22.61                        | 23.74  | 24.66  |
| <b>2060s</b>                         |                              |        |        |
| Total population (*1000)             | 11,974                       | 13,710 | 16,103 |
| Male population (*1000)              | 5,987                        | 6,895  | 8,146  |
| Female population (*1000)            | 5,988                        | 6,815  | 7,956  |
| Population<65 years (*1000)          | 8,312                        | 8,817  | 9,493  |
| Population≥65 years (*1000)          | 3,662                        | 4,893  | 6,610  |
| Percentage of elderly population (%) | 30.58                        | 35.69  | 41.05  |
| <b>2090s</b>                         |                              |        |        |
| Total population (*1000)             | 8,601                        | 11,761 | 16,655 |
| Male population (*1000)              | 4,321                        | 5,961  | 8,500  |
| Female population (*1000)            | 4,280                        | 5,800  | 8,156  |
| Population<65 years (*1000)          | 6,088                        | 7,533  | 9,040  |
| Population≥65 years (*1000)          | 2,513                        | 4,228  | 7,615  |
| Percentage of elderly population (%) | 29.22                        | 35.95  | 45.72  |

Low: The 10<sup>th</sup> percentile of future 10,000 projection trajectories. Medium: The median value of future 10,000 projection trajectories. High: The 90<sup>th</sup> percentile of future 10,000 projection trajectories. Elderly: Population≥65 years.

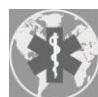

**Table S3.** Annual temperature (°C) in the 2030s, 2060s and 2090s under different climatic scenarios and models.

| Climatic Model | Mean (SD) temperature |           |           |           |           |           |           |            |           |
|----------------|-----------------------|-----------|-----------|-----------|-----------|-----------|-----------|------------|-----------|
|                | RCP 2-6               |           |           | RCP 4-5   |           |           | RCP8-5    |            |           |
|                | 2030s                 | 2060s     | 2090s     | 2030s     | 2060s     | 2090s     | 2030s     | 2060s      | 2090s     |
| ACCESS1-0      | -                     | -         | -         | 21.9(6.6) | 22.6(6.2) | 23.1(6.0) | 21.9(6.7) | 23.4(5.9)  | 24.6(5.0) |
| ACCESS1-3      | -                     | -         | -         | 21.4(6.8) | 22.3(6.4) | 22.4(6.2) | 21.6(6.7) | 22.8(5.8)  | 23.7(5.1) |
| bcc-csm1-1     | 21.9(7.0)             | 21.9(7.1) | 21.7(7.2) | 21.8(7.0) | 22.2(7.0) | 22.5(6.7) | 22.0(7.0) | 22.8(6.6)  | 23.8(5.9) |
| bcc-csm1-1-m   | 21.8(6.9)             | 21.9(6.8) | 21.6(7.1) | 21.8(6.9) | 22.1(6.9) | 22.2(6.9) | 21.8(7.0) | 22.6(6.6)  | 23.4(6.1) |
| BNU-ESM        | 21.4(7.4)             | 21.6(7.4) | 21.6(7.3) | 21.6(7.4) | 22.3(6.9) | 22.4(7.0) | 21.9(7.2) | 22.8(6.7)  | 23.6(6.1) |
| CanESM2        | 22.3(7.0)             | 22.2(7.1) | 22.0(7.2) | 22.1(7.1) | 22.5(7.1) | 22.9(6.8) | 22.4(7.0) | 23.0(6.6)  | 23.4(5.8) |
| CCSM4          | 21.5(7.2)             | 21.5(7.1) | 21.5(7.1) | 21.6(7.1) | 22.0(6.9) | 22.0(6.9) | 21.5(7.2) | 22.5(6.7)  | 23.5(6.0) |
| CESM1-BGC      | -                     | -         | -         | 21.5(7.1) | 21.9(7.0) | 22.2(6.7) | 21.6(7.1) | 22.5(6.6)  | 23.1(6.2) |
| CESM1-CAM5     | 21.8(6.9)             | 22.1(6.8) | 22.3(6.8) | 21.7(7.0) | 22.5(6.8) | 23.1(6.6) | 22.0(6.9) | 2.3-4(6.3) | 24.4(5.8) |
| CMCC-CM        | -                     | -         | -         | 21.8(7.0) | 22.6(6.5) | 22.9(6.4) | 22.1(6.8) | 23.1(6.2)  | 24.2(5.4) |
| CMCC-CMS       | -                     | -         | -         | 22.0(6.8) | 22.7(6.3) | 23.2(6.0) | 22.0(6.7) | 23.4(5.9)  | 24.7(4.9) |
| CNRM-CM5       | 21.5(7.3)             | 21.7(7.3) | 21.6(7.2) | 21.5(7.4) | 22.1(7.0) | 22.3(7.0) | 21.7(7.2) | 22.6(6.9)  | -         |
| CSIRO-Mk3-6-0  | 21.8(6.6)             | 22.1(6.4) | 22.1(6.5) | 21.8(6.6) | 22.5(6.3) | 22.8(5.9) | 21.8(6.8) | 23.0(5.8)  | 23.9(4.8) |
| GFDL-CM3       | 22.1(7.0)             | 22.5(6.6) | 22.4(6.6) | 22.1(6.9) | 22.5(6.6) | 22.9(6.2) | 22.1(6.9) | 23.0(6.2)  | 23.5(5.3) |
| GFDL-ESM2G     | 21.3(7.6)             | 21.1(7.7) | 21.1(7.6) | 21.2(7.4) | 21.4(7.4) | 21.6(7.4) | 21.3(7.5) | 22.2(7.0)  | 22.4(6.8) |
| GFDL-ESM2M     | -                     | -         | -         | 21.5(7.8) | 22.0(7.6) | 21.9(7.8) | 21.8(7.6) | 22.3(7.4)  | 23.0(7.0) |
| Inmcm4         | -                     | -         | -         | 21.2(7.8) | 21.5(7.7) | 21.6(7.7) | 21.4(7.7) | 22.2(7.5)  | 23.0(7.1) |
| IPSL-CM5A-LR   | 21.8(6.8)             | 22.1(6.6) | 21.9(6.9) | 22.2(6.5) | 22.6(6.5) | 22.8(6.4) | 22.2(6.5) | 23.4(5.9)  | 24.1(5.3) |
| IPSL-CM5A-MR   | 21.6(7.1)             | 22.0(6.9) | 21.8(7.0) | 22.0(6.9) | 22.3(6.9) | 22.8(6.5) | 22.0(7.0) | 23.2(6.4)  | 24.4(5.4) |
| IPSL-CM5B-LR   | -                     | -         | -         | 21.6(7.1) | 22.1(6.8) | 22.3(6.7) | 21.8(7.0) | 22.9(6.3)  | 23.4(5.9) |
| MIROC-ESM-CHEM | 21.7(7.9)             | 22.0(7.8) | 21.9(7.8) | 21.7(7.9) | 22.4(7.7) | 22.6(7.5) | 21.9(7.9) | 22.8(7.4)  | 24.4(6.6) |
| MIROC-ESM      | 22.0(7.7)             | 22.0(7.5) | 22.3(7.6) | 22.0(7.6) | 22.6(7.5) | 22.8(7.4) | 21.8(7.7) | 22.9(7.4)  | 24.1(6.8) |
| MIROC5         | 21.6(6.8)             | 22.1(6.5) | 22.1(6.5) | 21.8(6.6) | 22.6(6.2) | 22.6(6.2) | 21.9(6.7) | 22.9(5.9)  | 23.7(5.1) |
| MPI-ESM-LR     | 21.8(6.8)             | 21.7(6.9) | 21.7(6.8) | 22.1(6.7) | 22.4(6.5) | 22.5(6.4) | 22.1(6.6) | 23.2(6.0)  | 24.2(5.4) |
| MPI-ESM-MR     | 21.7(7.1)             | 21.9(6.9) | 21.8(7.0) | 21.9(6.9) | 22.4(6.7) | 22.5(6.5) | 22.0(6.8) | 23.1(6.1)  | 24.1(5.3) |
| MRI-CGCM3      | 21.3(7.0)             | 21.6(6.9) | 21.8(6.7) | 21.6(6.8) | 21.9(6.6) | 22.2(6.5) | 21.5(6.8) | 22.4(6.3)  | 23.4(5.6) |
| NorESM1-M      | 21.4(7.3)             | 21.8(7.0) | 21.8(7.1) | 21.8(7.1) | 22.2(6.9) | 22.4(6.9) | 21.8(7.1) | 23.0(6.5)  | 24.1(5.9) |
| Average        | 21.7                  | 21.9      | 21.8      | 21.8      | 22.3      | 22.5      | 21.9      | 22.9       | 23.8      |

-: Data not available.

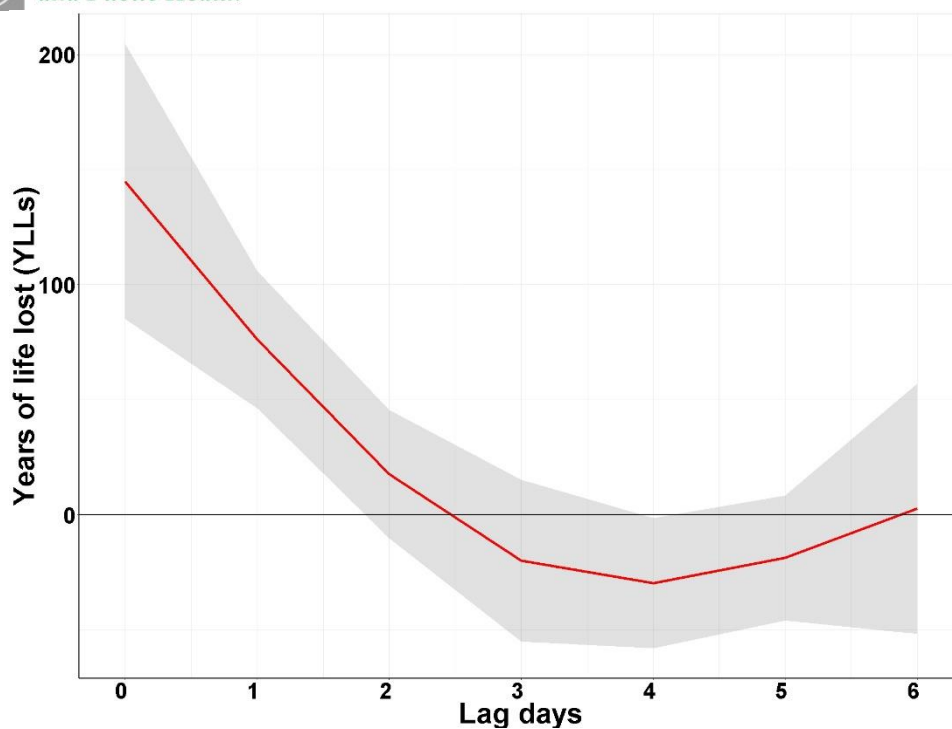

**Figure S4.** Lag effects of TM (30°C) on YLLs in the total population during 2010-2015 in Guangzhou, China.

Note: All effects of TM on YLLs were adjusted for secular trend, wind speed, day of week, relative humidity, SO<sub>2</sub>, NO<sub>2</sub> and PM<sub>10</sub>. The reference temperature was 23.0°C in the DLNM model. Lag effect: The heat effects mainly appeared during the first two days.



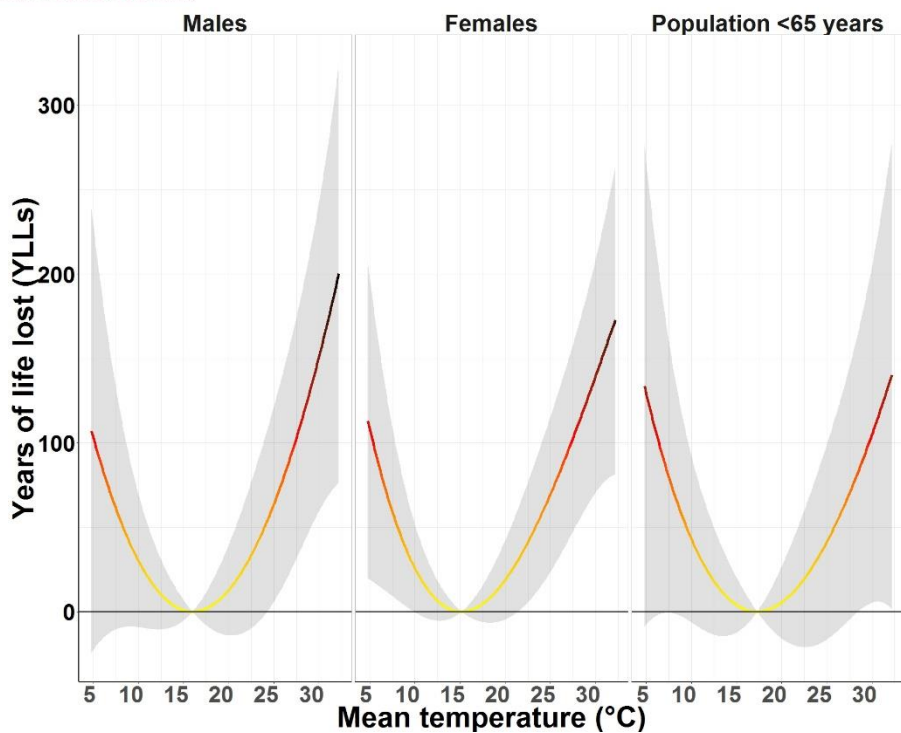

**Figure S5.** Relationship between daily TM and YLLs in males, females and the population < 65 years during 2010-2015 in Guangzhou, China.

Note: All effects of TM on YLLs were adjusted for secular trend, wind speed, day of week, relative humidity, SO<sub>2</sub>, NO<sub>2</sub> and PM<sub>10</sub>.

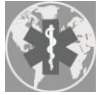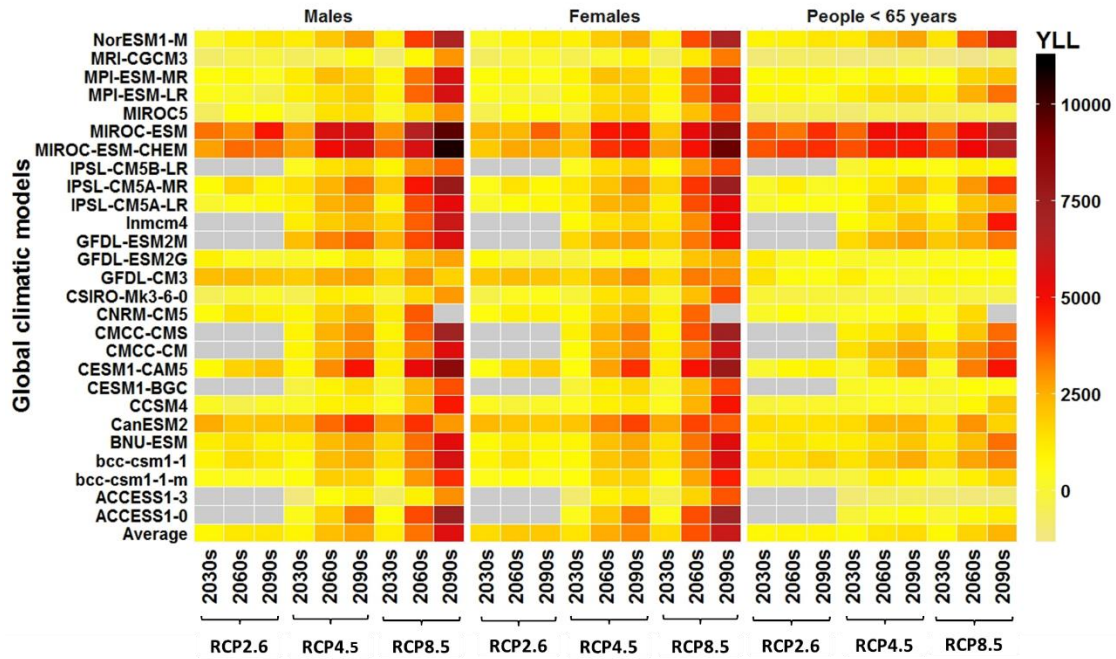

**Figure S6.** Annual heat-related YLLs in males, females and population <65 years in the 2030s, 2060s and 2090s as compared with the 1980s under different climatic scenarios and GCMs.

Note: We assumed that the population size and their adaptation in the 21<sup>st</sup> century will remain constant at the 2010 level. Gray grids meant the data were not available. The heat-related YLLs in the future have been subtracted by the heat-related YLLs in the 1980s.

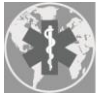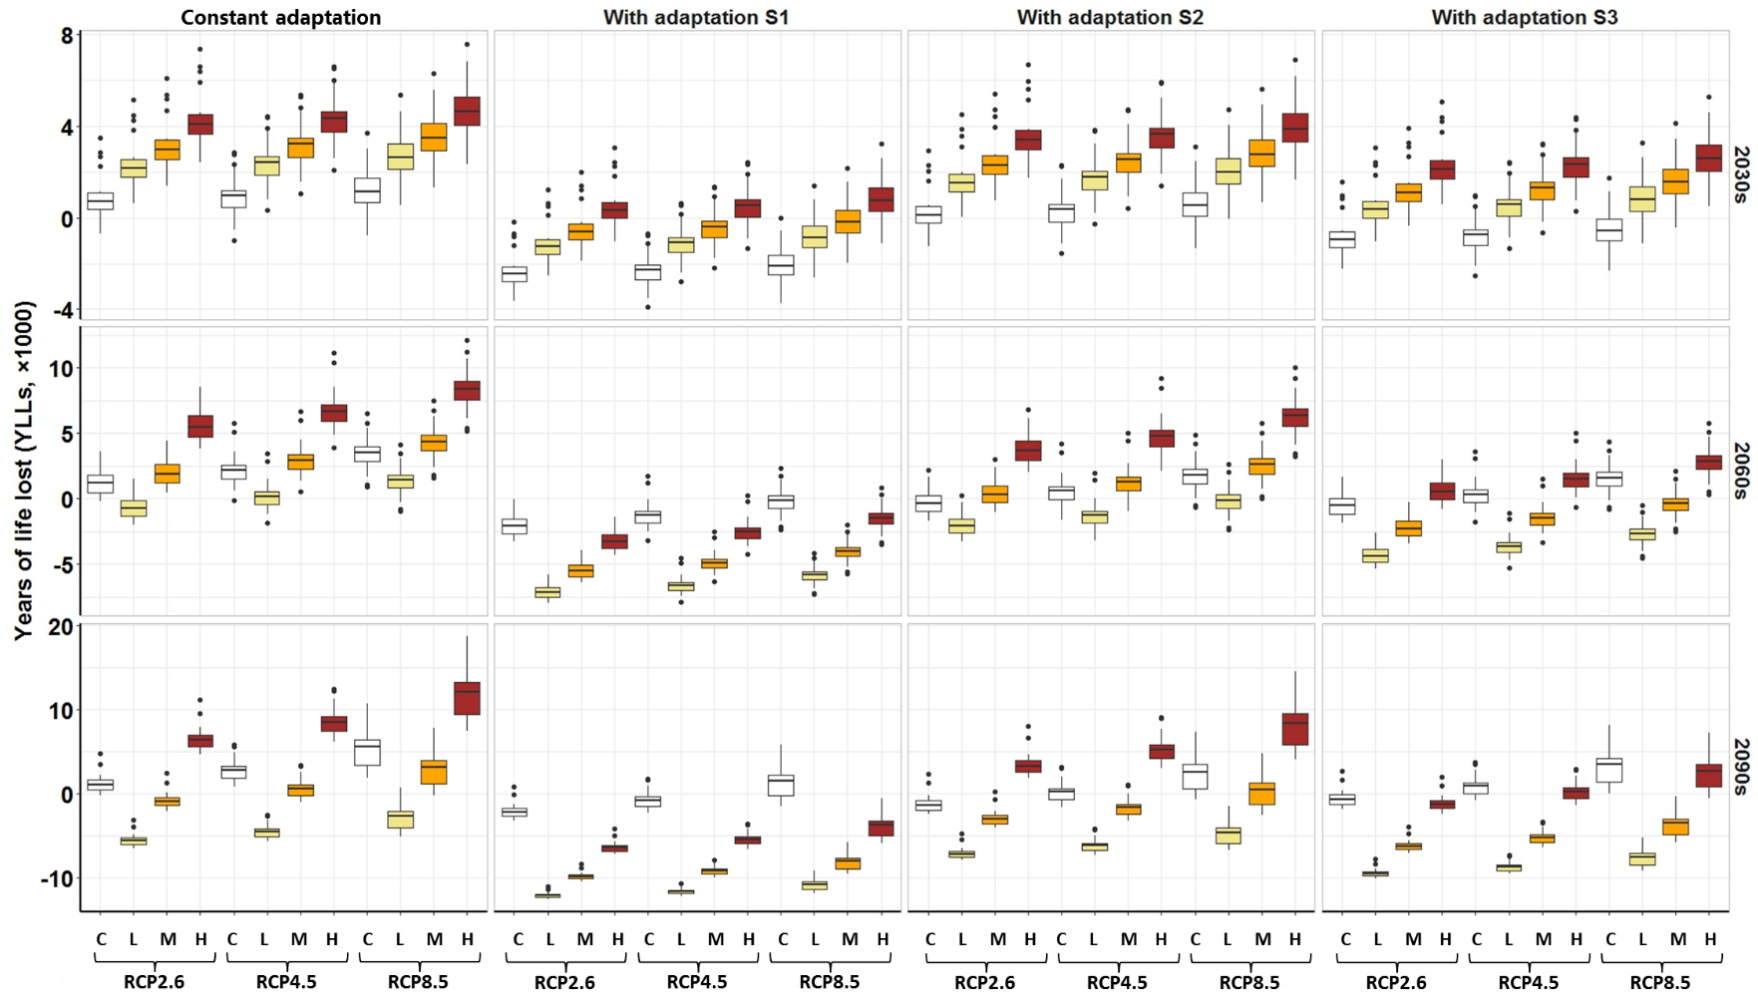

**Figure S7.** Impacts of population expansion and adaptation on the annual heat-related YLLs in males in Guangzhou in the 2030s, 2060s and 2090s under different scenarios.

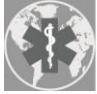

Constant adaptation: People's adaptation to high temperature will remain constant at the 2010 level.

Adaptation S1: People's adaptation to high temperature will increase by 8.92% per decade.

Adaptation S2: People's adaptation to high temperature will increase by 4.60% per decade.

Adaptation S3: People's adaptation to high temperature will increase by 0.2°C per decade.

C: The population size will remain constant at the 2010 level.

L: Low population expansion scenario.

M: Medium population expansion scenario.

H: High population expansion scenario.

The heat-related YLLs in the future have been subtracted by the heat-related YLLs in the 1980s.

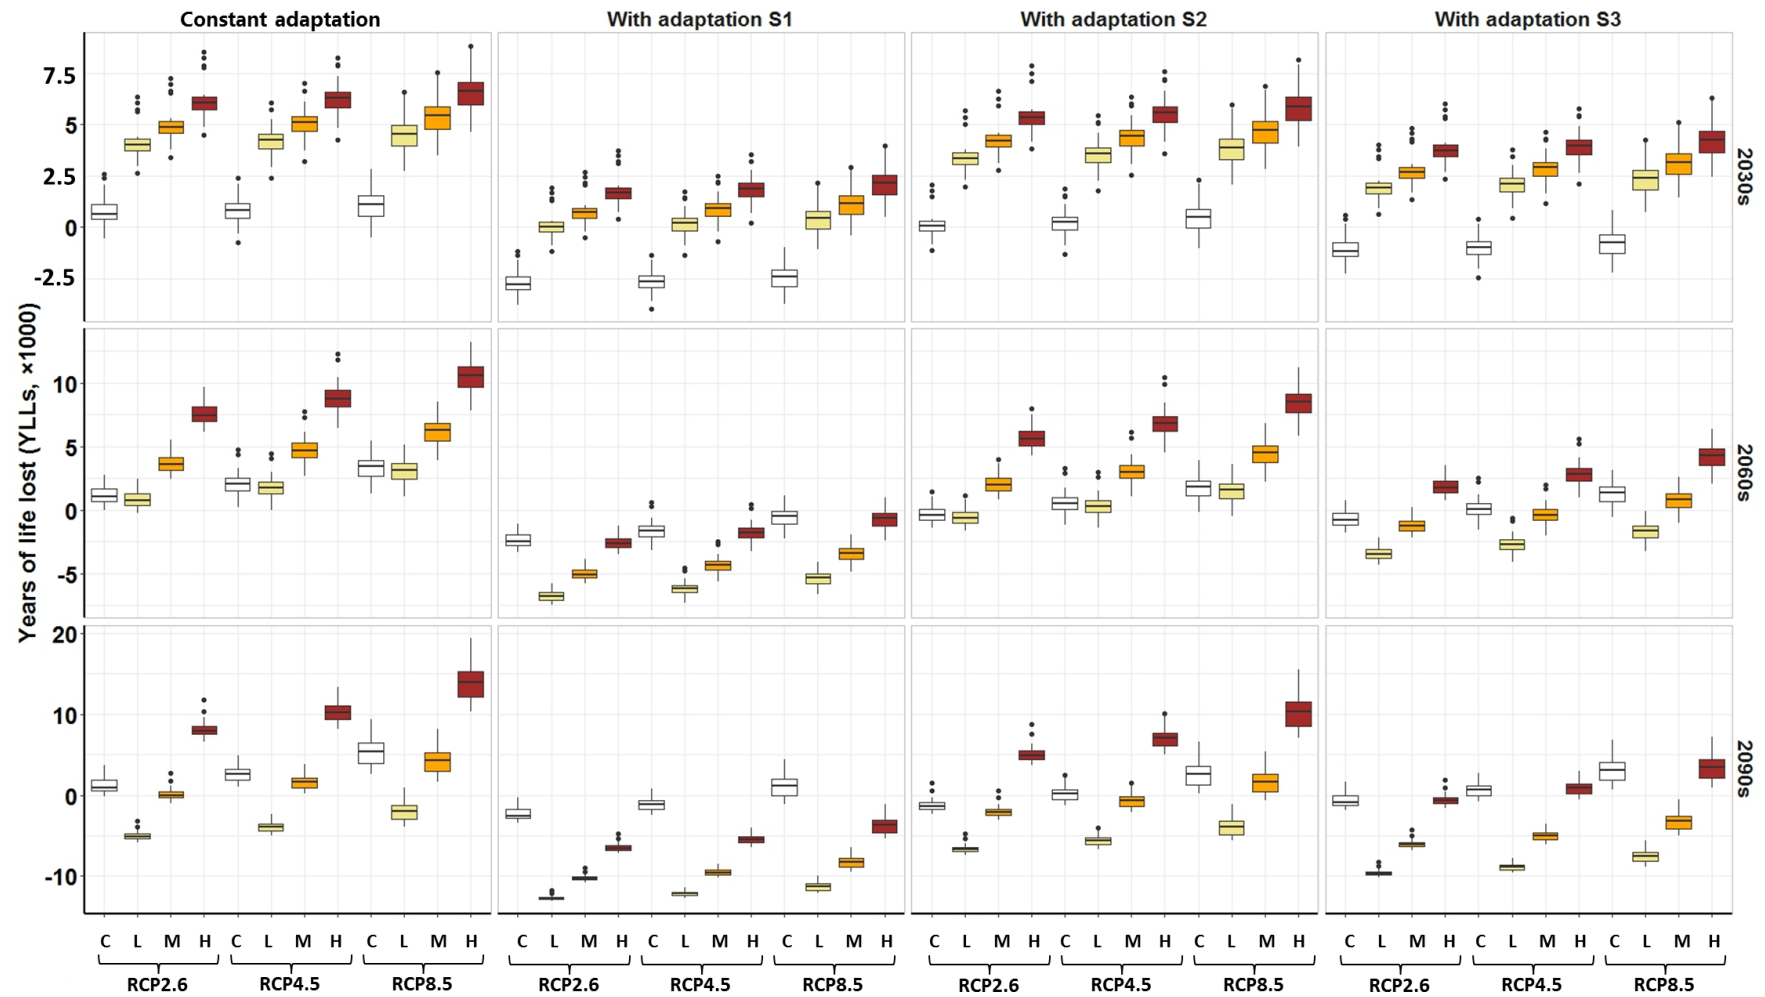

**Figure S8.** Impacts of population expansion and adaptation on the annual heat-related YLLs in females in Guangzhou in the 2030s, 2060s and 2090s under different scenarios.



Constant adaptation: People's adaptation to high temperature will remain constant at the 2010 level.

Adaptation S1: People's adaptation to high temperature will increase by 8.92% per decade.

Adaptation S2: People's adaptation to high temperature will increase by 4.60% per decade.

Adaptation S3: People's adaptation to high temperature will increase by 0.2°C per decade.

C: The population size will remain constant at the 2010 level.

L: Low population expansion scenario.

M: Medium population expansion scenario.

H: High population expansion scenario.

The heat-related YLLs in the future have been subtracted by the heat-related YLLs in the 1980s.

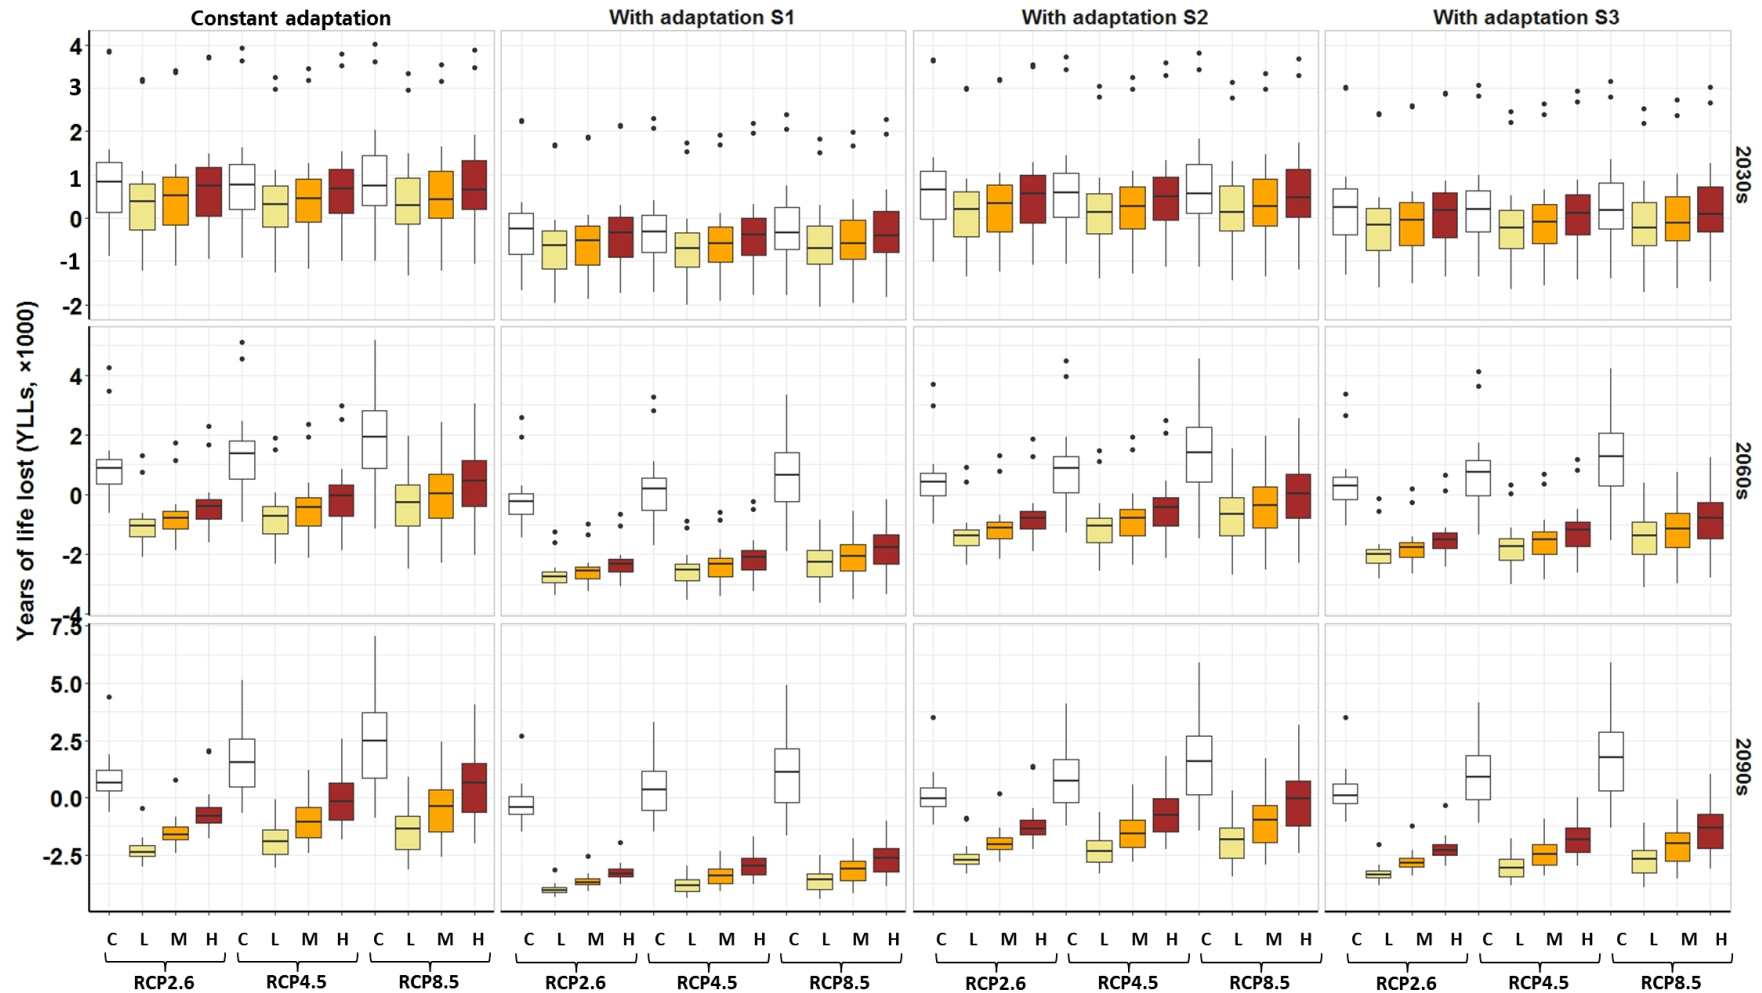

**Figure S9.** Impacts of population expansion and adaptation on the annual heat-related YLLs in people <65 years in Guangzhou in the 2030s, 2060s and 2090s under different scenarios.



Constant adaptation: People's adaptation to high temperature will remain constant at the 2010 level.

Adaptation S1: People's adaptation to high temperature will increase by 8.92% per decade.

Adaptation S2: People's adaptation to high temperature will increase by 4.60% per decade.

Adaptation S3: People's adaptation to high temperature will increase by 0.2°C per decade.

C: The population size will remain constant at the 2010 level.

L: Low population expansion scenario.

M: Medium population expansion scenario.

H: High population expansion scenario.

The heat-related YLLs in the future have been subtracted by the heat-related YLLs in the 1980s.



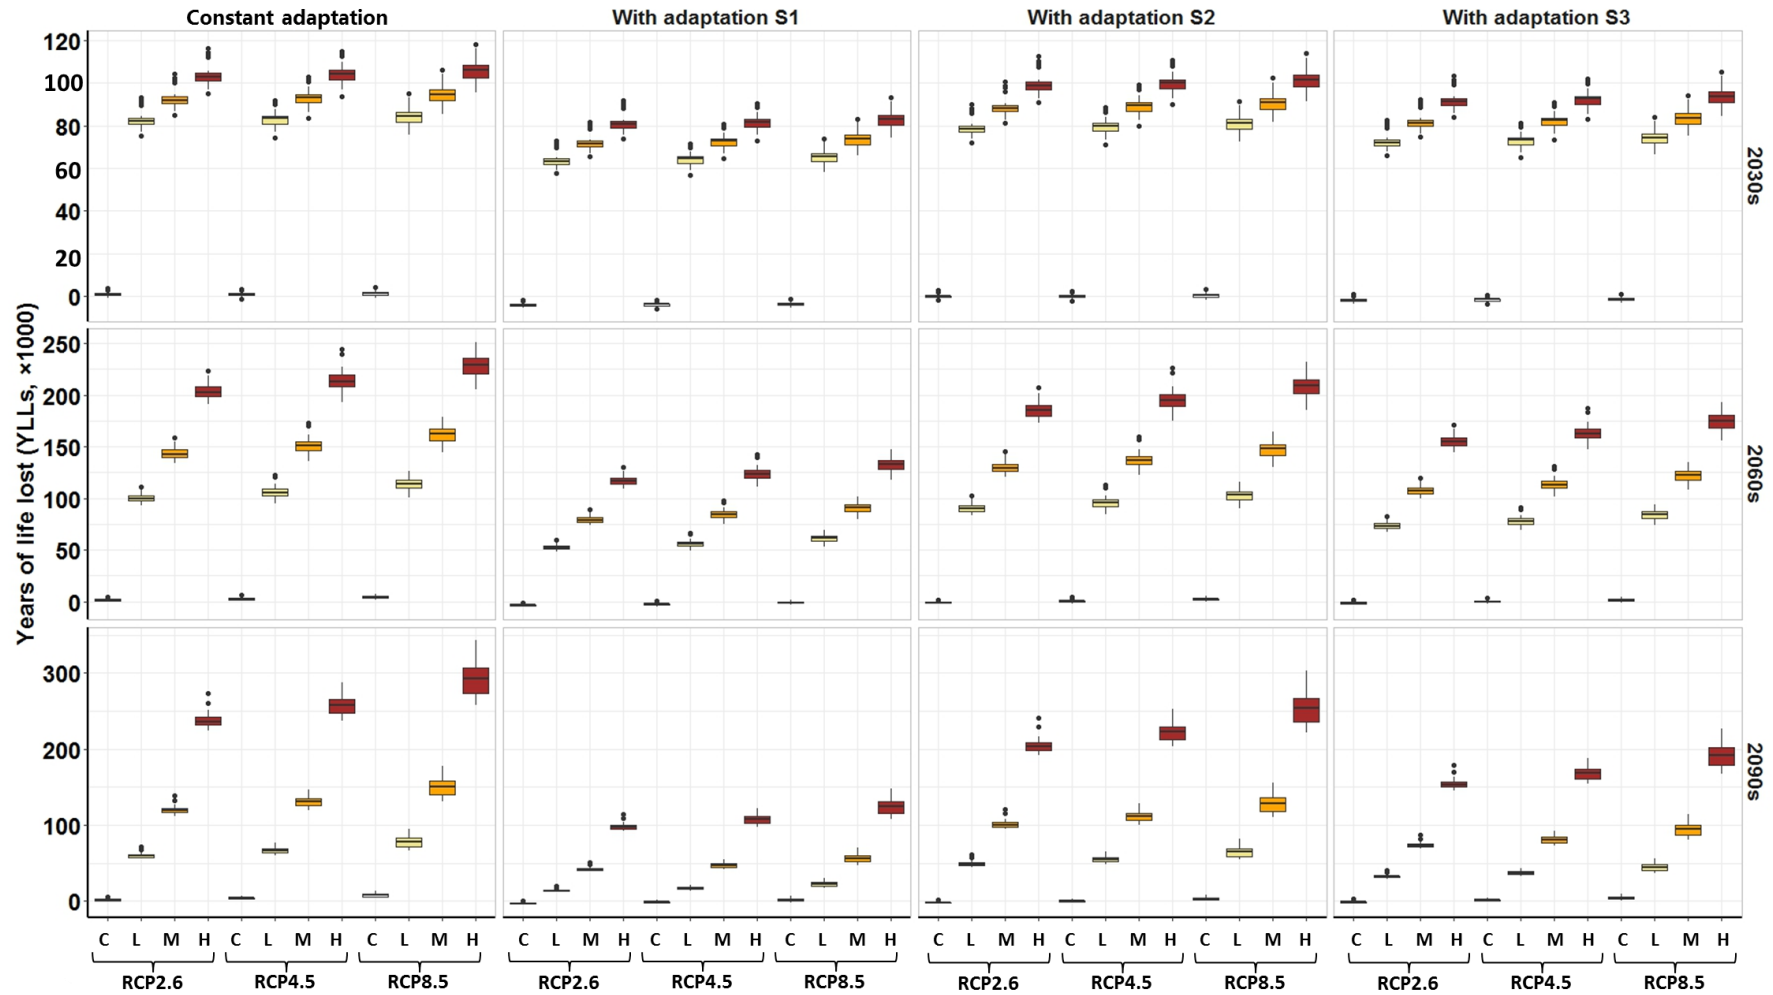

**Figure S10.** Impacts of population expansion and adaptation on the annual heat-related YLLs in the elderly population in Guangzhou in the 2030s, 2060s and 2090s under different scenarios.



Constant adaptation: People's adaptation to high temperature will remain constant at the 2010 level.

Adaptation S1: People's adaptation to high temperature will increase by 8.92% per decade.

Adaptation S2: People's adaptation to high temperature will increase by 4.60% per decade.

Adaptation S3: People's adaptation to high temperature will increase by 0.2°C per decade.

C: The population size will remain constant at the 2010 level.

L: Low population expansion scenario.

M: Medium population expansion scenario.

H: High population expansion scenario.

The heat-related YLLs in the future have been subtracted by the heat-related YLLs in the 1980s.

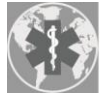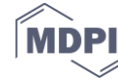

**Table S4.** Increase rate ( $\beta$ , P) of heat-related YLLs for each unit increase in population size and aging degree under different scenarios.

|                                     | Constant adaptation |               |               | With adaptation S1 |               |               | With adaptation S2 |               |               | With adaptation S3 |               |               |
|-------------------------------------|---------------------|---------------|---------------|--------------------|---------------|---------------|--------------------|---------------|---------------|--------------------|---------------|---------------|
|                                     | RCP2-6              | RCP4-5        | RCP8-5        | RCP2-6             | RCP4-5        | RCP8-5        | RCP2-6             | RCP4-5        | RCP8-5        | RCP2-6             | RCP4-5        | RCP8-5        |
| <b>2030s</b>                        |                     |               |               |                    |               |               |                    |               |               |                    |               |               |
| <b>Total population (×1000)*</b>    | 4.23 (0.005)        | 4.23 (0.005)  | 4.29 (0.005)  | 3.51 (0.005)       | 3.51 (0.005)  | 3.56 (0.005)  | 4.10 (0.005)       | 4.10 (0.005)  | 4.15 (0.005)  | 3.85 (0.005)       | 3.85 (0.005)  | 3.90 (0.005)  |
| <b>Males (×1000)*</b>               | 1.89 (0.003)        | 1.90 (0.003)  | 1.92 (0.003)  | 1.57 (0.003)       | 1.57 (0.003)  | 1.60 (0.003)  | 1.83 (0.003)       | 1.84 (0.003)  | 1.86 (0.003)  | 1.72 (0.003)       | 1.72 (0.003)  | 1.75 (0.003)  |
| <b>Females (×1000)*</b>             | 2.03 (0.002)        | 2.03 (0.002)  | 2.06 (0.002)  | 1.68 (0.002)       | 1.68 (0.002)  | 1.71 (0.002)  | 1.97 (0.002)       | 1.97 (0.002)  | 2.00 (0.002)  | 1.85 (0.002)       | 1.85 (0.002)  | 1.87 (0.002)  |
| <b>People &lt;65 years (×1000)*</b> | 0.64 (0.004)        | 0.63 (0.004)  | 0.64 (0.004)  | 0.53 (0.004)       | 0.52 (0.004)  | 0.53 (0.004)  | 0.62 (0.004)       | 0.61 (0.004)  | 0.62 (0.004)  | 0.58 (0.004)       | 0.57 (0.004)  | 0.58 (0.004)  |
| <b>Elderly(×1000)*</b>              | 2.89 (<0.001)       | 2.90 (<0.001) | 2.93 (<0.001) | 2.40 (<0.001)      | 2.40 (<0.001) | 2.43 (<0.001) | 2.80 (<0.001)      | 2.81 (<0.001) | 2.84 (<0.001) | 2.63 (<0.001)      | 2.64 (<0.001) | 2.67 (<0.001) |
| <b>Aging degree#</b>                | 423.3 (0.015)       | 423.3 (0.015) | 428.0 (0.015) | 364.6 (0.017)      | 364.8 (0.017) | 368.5 (0.017) | 412.5 (0.015)      | 412.8 (0.015) | 417.1 (0.015) | 392.4 (0.016)      | 392.6 (0.016) | 396.6 (0.016) |
| <b>2060s</b>                        |                     |               |               |                    |               |               |                    |               |               |                    |               |               |
| <b>Total population (×1000)*</b>    | 4.28 (0.001)        | 4.48 (0.001)  | 4.75 (0.001)  | 2.68 (0.001)       | 2.81 (0.001)  | 2.98 (0.001)  | 3.94 (0.001)       | 4.12 (0.001)  | 4.37 (0.001)  | 3.38 (0.001)       | 3.54 (0.001)  | 3.75 (0.001)  |
| <b>Males (×1000)*</b>               | 3.10 (0.015)        | 3.26 (0.015)  | 3.46 (0.015)  | 1.94 (0.015)       | 2.04 (0.015)  | 2.17 (0.015)  | 2.86 (0.015)       | 3.00 (0.015)  | 3.19 (0.015)  | 2.45 (0.015)       | 2.57 (0.015)  | 2.73 (0.015)  |
| <b>Females(×1000)*</b>              | 3.56 (0.014)        | 3.72 (0.014)  | 3.94 (0.014)  | 2.23 (0.014)       | 2.33 (0.014)  | 2.47 (0.014)  | 3.31 (0.014)       | 3.47 (0.014)  | 3.67 (0.014)  | 2.81 (0.014)       | 2.94 (0.014)  | 3.11 (0.014)  |
| <b>People &lt;65 years (×1000)*</b> | 1.14 (0.047)        | 1.21 (0.047)  | 1.30 (0.047)  | 0.71 (0.047)       | 0.76 (0.047)  | 0.81 (0.047)  | 1.06 (0.047)       | 1.12 (0.047)  | 1.21 (0.047)  | 0.90 (0.047)       | 0.95 (0.047)  | 1.03 (0.047)  |
| <b>Elderly(×1000)*</b>              | 17.57 (0.014)       | 18.34 (0.014) | 19.41 (0.014) | 11.01 (0.014)      | 11.49 (0.014) | 12.17 (0.014) | 16.2 (0.014)       | 16.92 (0.014) | 17.92 (0.014) | 13.88 (0.014)      | 14.49 (0.014) | 15.34 (0.014) |
| <b>Aging degree#</b>                | 407.3 (0.001)       | 422.7 (0.001) | 444.1 (0.001) | 276.5 (0.001)      | 286.1 (0.001) | 299.6 (0.001) | 380.0 (0.001)      | 394.3 (0.001) | 414.3 (0.001) | 333.8 (0.001)      | 345.9 (0.001) | 362.9 (0.001) |
| <b>2090s</b>                        |                     |               |               |                    |               |               |                    |               |               |                    |               |               |
| <b>Total population (×1000)*</b>    | 4.28 (<0.001)       | 4.59 (<0.001) | 5.17 (<0.001) | 2.03 (<0.001)      | 2.17 (<0.001) | 2.45 (<0.001) | 3.74 (<0.001)      | 4.01 (<0.001) | 4.52 (<0.001) | 2.94 (<0.001)      | 3.15 (<0.001) | 3.55 (<0.001) |
| <b>Males (×1000)*</b>               | 3.79 (0.039)        | 4.08 (0.039)  | 4.60 (0.039)  | 1.80 (0.039)       | 1.93 (0.039)  | 2.18 (0.039)  | 3.32 (0.039)       | 3.58 (0.039)  | 4.03 (0.039)  | 2.60 (0.039)       | 2.80 (0.039)  | 3.16 (0.039)  |
| <b>Females(×1000)*</b>              | 4.28 (0.034)        | 4.59 (0.034)  | 5.17 (0.034)  | 2.03 (0.034)       | 2.17 (0.034)  | 2.45 (0.034)  | 3.81 (0.034)       | 4.09 (0.034)  | 4.61 (0.034)  | 2.94 (0.034)       | 3.15 (0.034)  | 3.55 (0.034)  |
| <b>People &lt;65 years (×1000)*</b> | 0.74 (0.048)        | 0.80 (0.048)  | 0.92 (0.048)  | 0.35 (0.048)       | 0.38 (0.048)  | 0.44 (0.048)  | 0.66 (0.048)       | 0.71 (0.048)  | 0.82 (0.048)  | 0.51 (0.048)       | 0.55 (0.048)  | 0.63 (0.048)  |
| <b>Elderly(×1000)*</b>              | 38.59 (0.033)       | 41.3 (0.033)  | 46.45 (0.033) | 18.27 (0.033)      | 19.56 (0.033) | 22.0 (0.033)  | 33.84 (0.033)      | 36.24 (0.033) | 40.79 (0.033) | 26.47 (0.033)      | 28.34 (0.033) | 31.87 (0.033) |
| <b>Aging degree#</b>                | 443.1 (0.023)       | 467.7 (0.022) | 514.4 (0.02)  | 258.9 (0.039)      | 270.5 (0.038) | 292.6 (0.035) | 400.1 (0.025)      | 421.8 (0.024) | 463.1 (0.022) | 333.3 (0.031)      | 350.1 (0.029) | 382.2 (0.027) |

Constant adaptation: People's adaptation to high temperature will remain constant at the 2010 level.

Adaptation S1: People's adaptation to high temperature will increase by 8.92% per decade.

Adaptation S2: People's adaptation to high temperature will increase by 4.60% per decade.

Adaptation S3: People's adaptation to high temperature will increase by 0.2°C per decade.

$\beta$  is the coefficient in the linear regression between heat-related YLLs and the percentage of population increase and aging degree.

The heat-related YLLs in the future have been subtracted by the heat-related YLLs in the 1980s.
